# Supplementary material for: ALD Deposited ZnO:Al Films on Mica for Flexible PDLC Devices
Source: MDPI journal article supplement (doi:10.3390/nano11041011), 2021-04-15
Supplement: s1 [file s1]

The Ohmic behavior is supported by measuring the current vs. voltage ( $I$ - $V$ ) characteristics of AZO films on mica shown in Figure S1. By using the formula  $R_s = 1/\sigma d$  (where  $\sigma$  is the electrical conductivity of the material and  $d$  is the thickness of the electrode) calculated sheet resistance value is also shown in Figure S1.

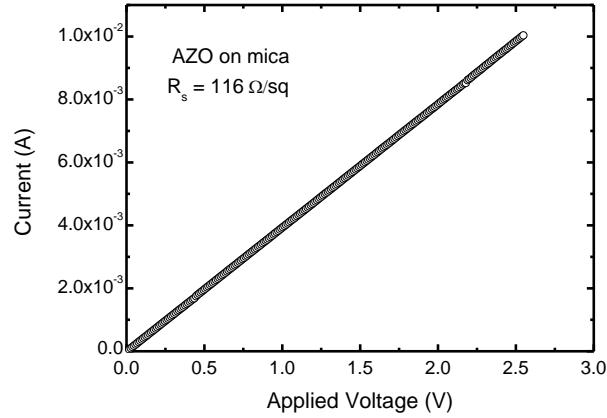

Figure S1. Current-voltage characteristic of AZO thin films deposited on mica substrate.

Photographs of the AZO on mica samples and bending test experimental set-up are shown in Figure S2 (a,b). The bending diameter of  $5 \times 5$  cm size AZO on mica samples was about 3 mm.

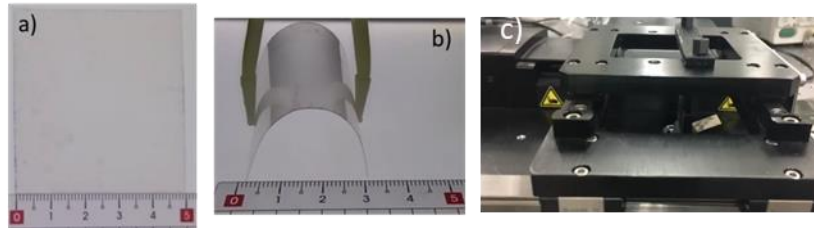

Figure S2. (a,b) Photographs of the AZO on mica sample and (c) bending test experimental set-up.
